# Supplementary material for: A Review of Tafamidis for the Treatment of Transthyretin-Related Amyloidosis
Source: Springer Nature journal article supplement (doi:10.1007/s40120-015-0031-3), 2015-08-14
Supplement: MOESM1 [file 9339528]

- Tafamidis is safe and effective in reducing the progress of neuropathy and in maintaining nutritional status and quality of life in Val30Met patients with stage 1 transthyretin familial amyloid polyneuropathy (TTR-FAP).
- To be most effective, treatment with tafamidis needs to be started as soon as possible once the diagnosis of TTR-FAP onset is suspected.
- The use of tafamidis in non-Val30Met TTR-FAP patients at early stage looks promising but is pending confirmation from long-term and placebo-controlled trials.
- Patients should be evaluated by multiple neurological and clinical assessments at referral centers at regular periods (every 6 months) to decide whether to continue or stop treatment, as it is now clear that different individual response profiles exist.

This summary slide represents the opinions of the authors. No funding or sponsorship was received for this study or publication of this article. For a full list of acknowledgments and conflicts of interest for all authors of this article, please see the full text online. Copyright © The Author(s) 2015. Creative Commons Attribution Noncommercial License (CC BY-NC).
